# Supplementary material for: Sensitized near-infrared lanthanide emission in chalcogenide perovskites
Source: Royal Society of Chemistry journal article supplement (doi:10.1039/d4tc04446k), 2024-11-28
Supplement: d4tc04446k1.pdf [file d4tc04446k1.pdf]

## Supporting Information

# Sensitized near infrared lanthanide emission in chalcogenide perovskites.

Jinan H. Al Shuhaib, Isabel J. Ferrer, José R. Ares, Salvatore Cianci, Federico Tuzi, Elena Blundo, Antonio Polimeni, Antonio Benayas, Riccardo Marin, Fabrice Leardini

### Table of Contents

|                                                                                                     |     |
|-----------------------------------------------------------------------------------------------------|-----|
| <b>S1</b> Optimization of the sulfurization process.....                                            | S2  |
| <b>Figure S1.</b> EDX spectra                                                                       |     |
| <b>Figure S2.</b> XRPD diffraction patterns                                                         |     |
| <b>Figure S3.</b> Raman spectra                                                                     |     |
| <b>Figure S4.</b> Pictures of (powder) samples                                                      |     |
| <b>Figure S5.</b> Diffuse reflectance spectra                                                       |     |
| <b>S2</b> Stability of the material.....                                                            | S6  |
| <b>Figure S6.</b> Thermogravimetry measurements and XRPD patterns                                   |     |
| <b>Figure S7.</b> XRPD patterns (as prepared vs. after one year air exposition)                     |     |
| <b>Figure S8.</b> EDX maps (after two years air exposition vs. after one hour in water)             |     |
| <b>S3</b> Additional characterization of the Ln <sup>3+</sup> -doped materials.....                 | S8  |
| <b>Figure S9.</b> High/magnification SEM image                                                      |     |
| <b>Figure S10.</b> BSE images and EDX maps of BZO-Ln series                                         |     |
| <b>Figure S11.</b> BSE images and EDX maps of BZS-Ln series                                         |     |
| <b>Figure S12.</b> XRPD patterns of Ln <sup>3+</sup> -doped sulfide samples                         |     |
| <b>Table S2.</b> Structural parameters obtained from the Rietveld refinements                       |     |
| <b>Figure S13.</b> Raman spectra                                                                    |     |
| <b>Table S3.</b> Wavenumber values (cm <sup>-1</sup> ) of the observed Raman bands                  |     |
| <b>Figure S14.</b> Tauc plot of the BZS-Yb sample                                                   |     |
| <b>Figure S15.</b> Photoluminescence of BSZ-Yb under 405-nm excitation as a function of temperature |     |
| <b>Figure S16.</b> Photoluminescence of BSZ-Yb under 532-nm excitation                              |     |
| <b>Figure S17.</b> Photoluminescence of BSZ-Nd under 405-nm excitation as a function of temperature |     |
| <b>Figure S18.</b> Photoluminescence of BSZ-Er under 405-nm excitation as a function of temperature |     |
| <b>References</b> .....                                                                             | S18 |

## S1. Optimization of the sulfurization process.

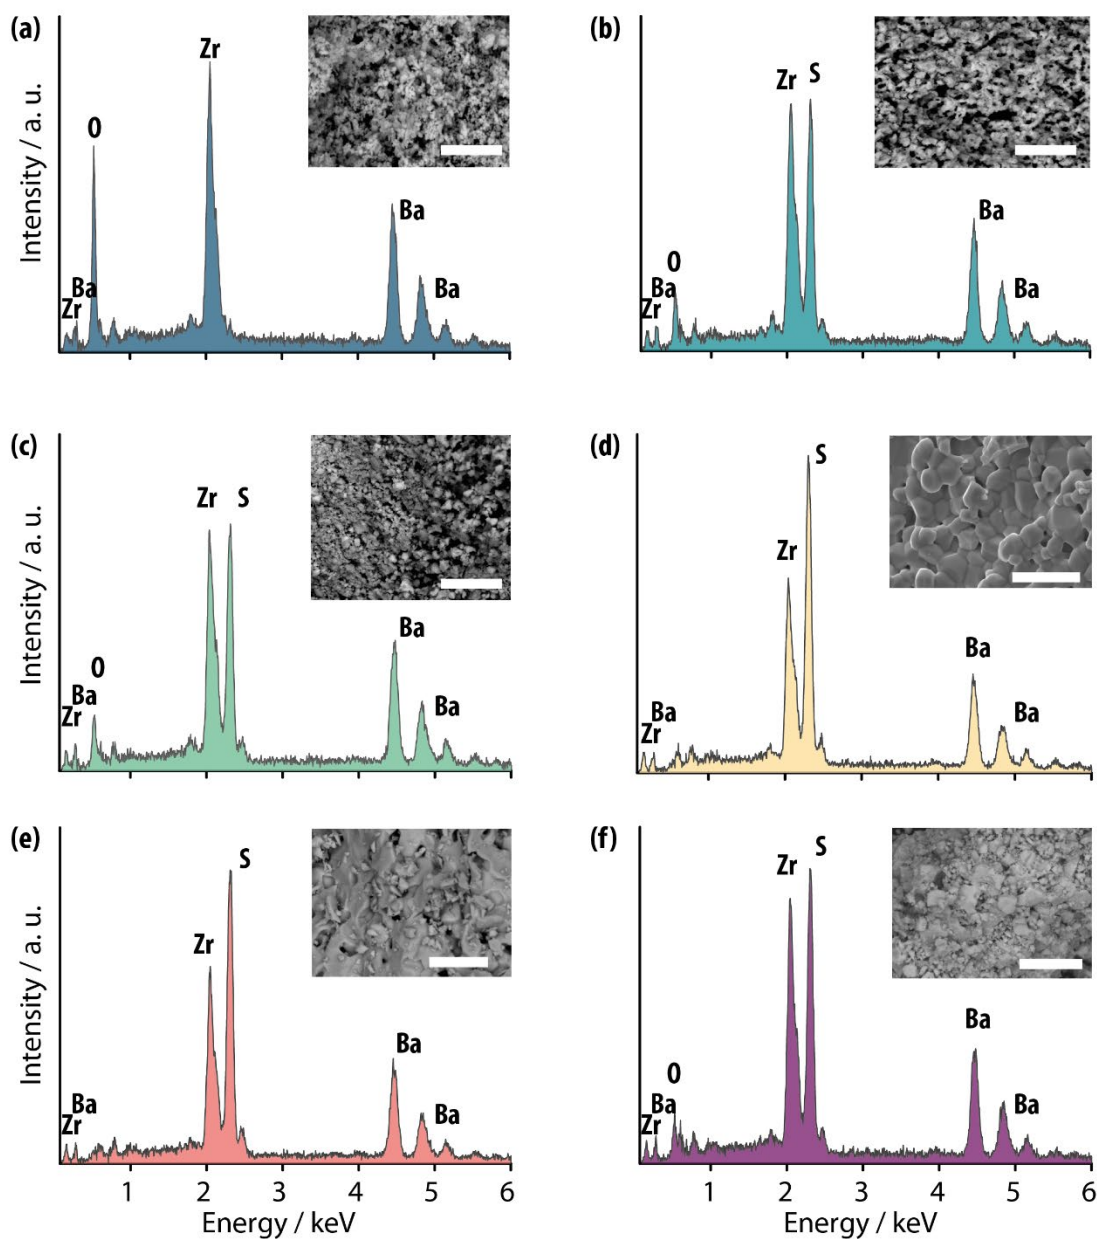

**Figure S1.** EDX spectra of (a) BZO, (b) BZS-900, (c) BZS-950, (d) BZS-1000, (e) BZS-1050 and (f) BZS-1100. The insets show the SEM images of the corresponding samples. The scale bar is 10 μm in all images.

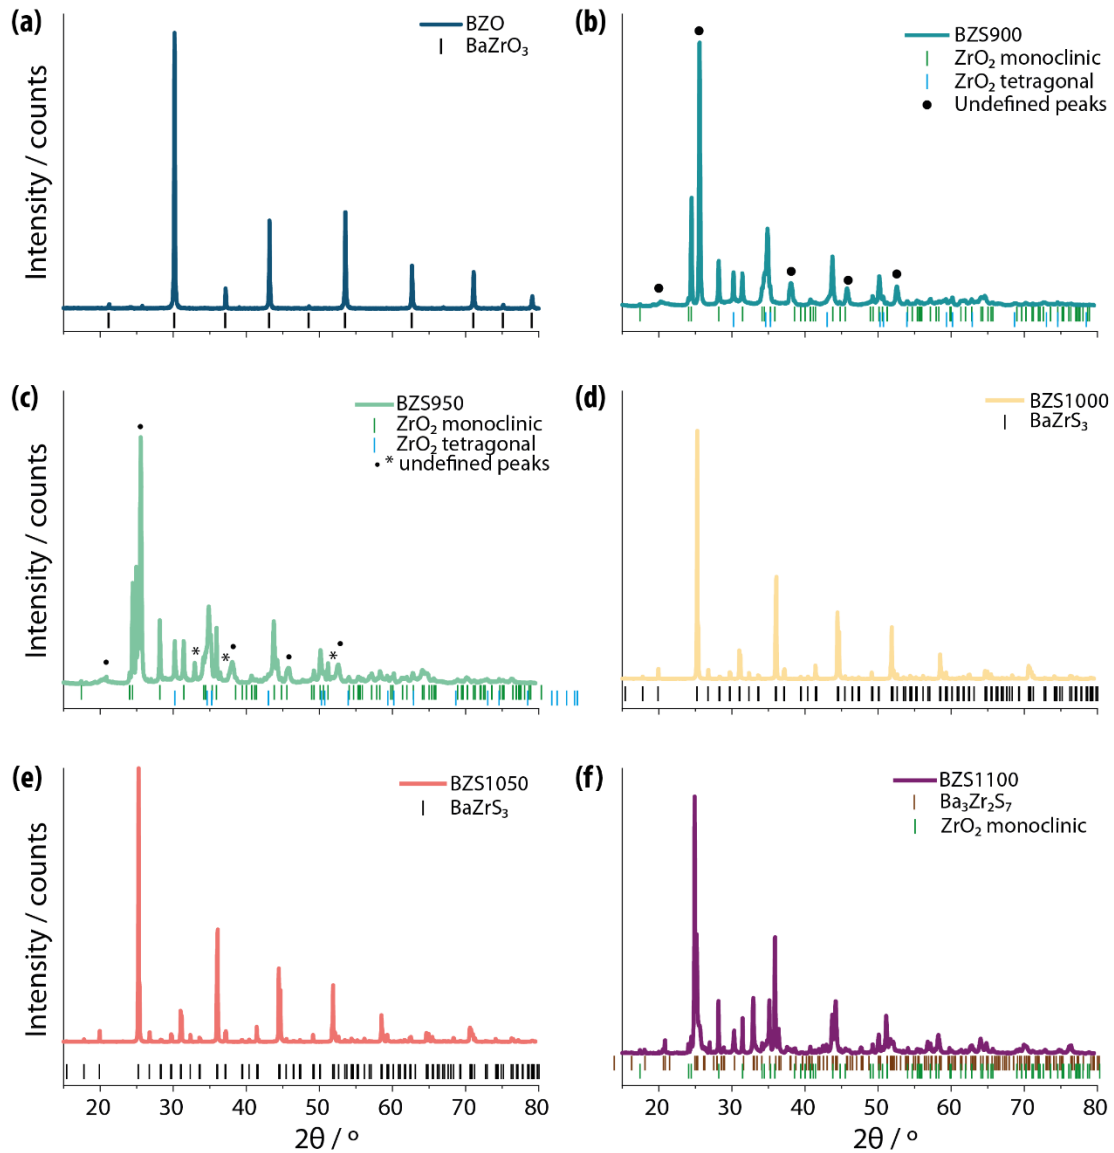

**Figure S2.** XRPD diffraction patterns of: (a) BZO, all peaks can be indexed to the space group  $Pm\bar{3}m$  (JCPDS 96-153-2744). (b) BZS-900 and (c) BZS-950. Both diffraction patterns present unidentified peaks coming presumably from a dominant undefined phase, as well as peaks related to monoclinic  $ZrO_2$  (with space group of  $P21/C$ ) and tetragonal  $ZrO_2$  (with space group of  $P42/nmc$ ) that matched the standard files JCPDS 01-078-1807 and 01-080-0784, respectively. (d) BZS-1000 and (e) BZS1050. Both patterns match the standard file JCPDS 01-073-0847, corresponding to  $BaZrS_3$  phase. (f) BZS1100 that matches the standard files JCPDS 01-078-1807 and JCPDS 01-080-1999, corresponding to monoclinic  $ZrO_2$  and to the  $Ba_3Zr_2S_7$  Ruddlesden-Popper phase.

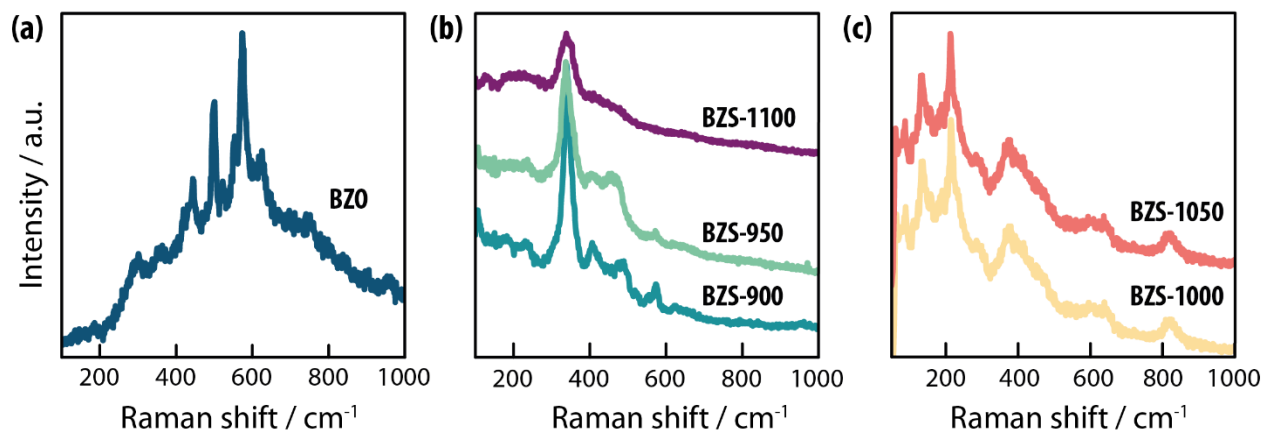

**Figure S3.** Raman spectra of (a)  $\text{BaZrO}_3$ , (b) samples containing the  $\text{ZrO}_2$  phase (BZS-900, BZS-950 and BZS-1100) and (c) samples containing  $\text{BaZrS}_3$  phase (BZS-1000 and BZS-1050).

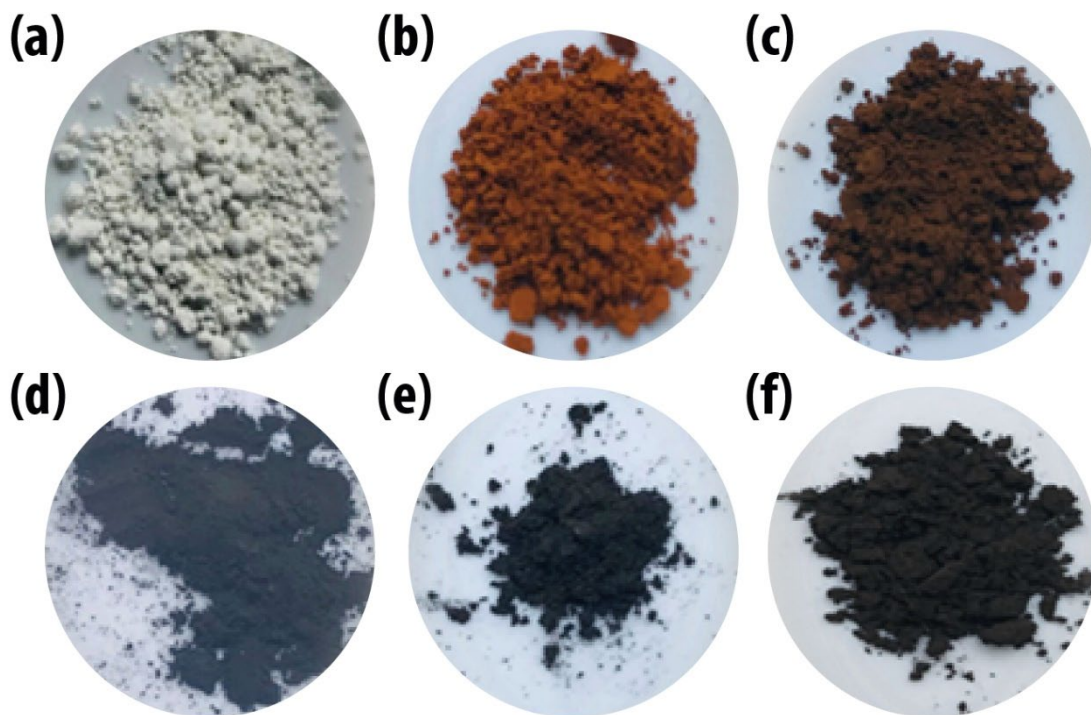

**Figure S4.** Pictures of (a) BZO, (b) BZS-900, (c) BZS-950, (d) BZS-1000, (e) BZS-1050 and (f) BZS-1100 powders.

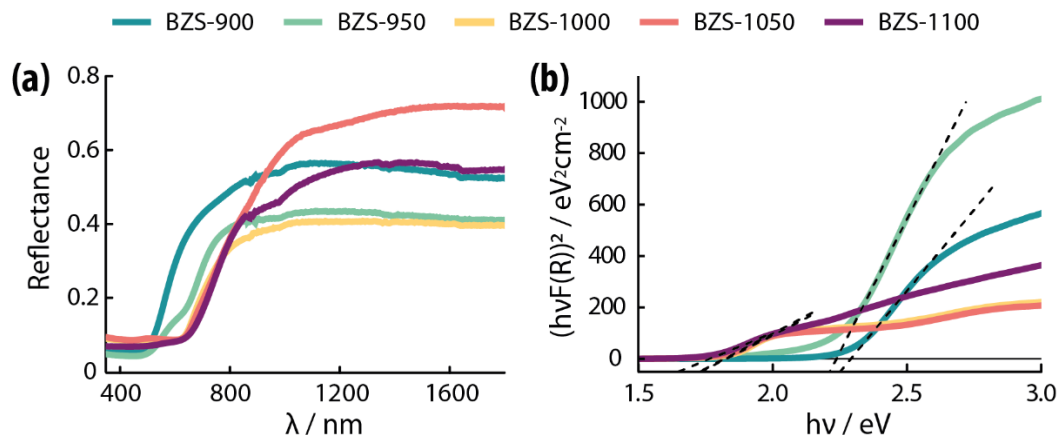

**Figure S5.** Diffuse reflectance spectra (a) and Tauc plots obtained from the corresponding Kubelka-Munk functions (b) of the BZS-series. The black dashed lines are the linear fits used to calculate the optical energy bandgaps. Different Tauc plots were checked by considering direct/indirect-allowed/forbidden transitions. Best fits were obtained by considering direct allowed transitions. From this Tauc analysis it becomes evident that the optical bandgap shifts to lower values when increasing the sulfurization temperature from 900 to 1000 °C and then stabilizes. The optical bandgaps of the undefined phases of BZS-900 and BZS-950 samples lie in the visible region and are different ( $2.29 \pm 0.06$  eV and  $2.23 \pm 0.06$  eV, respectively), suggesting that both samples have dissimilar composition and thus different optical properties. The optical bandgaps further decrease to about  $1.76 \pm 0.06$  eV for BZS-1000 and BZS-1050 samples, in good agreement with reported data for the  $\text{BaZrS}_3$  phase, which span between 1.73 and 1.85 eV [1, 2]. Finally, the optical bandgap of the  $\text{Ba}_3\text{Zr}_2\text{S}_7$  phase is quite similar to that obtained for the  $\text{BaZrS}_3$  phase, namely  $1.76 \pm 0.04$  eV. That value differs from previous theoretical predictions for that phase that computed an indirect transition with a bandgap energy of 1.25 eV [3, 4]. As far as we know no experimental results have been reported up to date for the optical bandgap of the Ruddlesden-Popper phase.

## S2. Stability of the material.

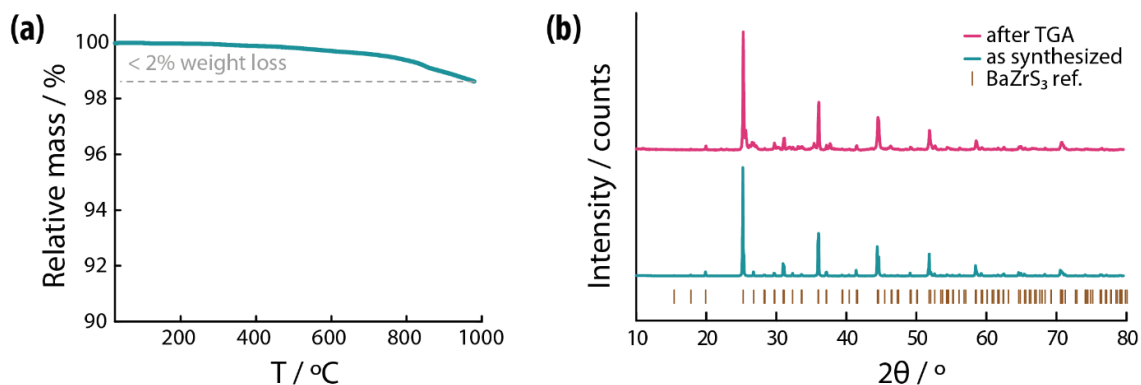

**Figure S6.** (a) Relative mass recorded during TGA run of BZS-1050 sample under Ar flow. (b) XRPD pattern of the as prepared sample and the one obtained after the TGA run. Vertical lines indicate the peak positions of BaZrS<sub>3</sub> phase with an orthorhombic distorted perovskite structure belonging to the space group *Pnma* (JCPDS 01-073-0847). It can be seen that the main phase appearing in the sample after the TGA measurement is still BaZrS<sub>3</sub>, although there are minor additional peaks that could be tentatively ascribed to the BaCO<sub>3</sub> and ZrO<sub>2</sub> (formed by reaction with O<sub>2</sub> and CO<sub>2</sub> traces present in the gas line) and to thermal decomposition of BaZrS<sub>3</sub> into Ba<sub>3</sub>Zr<sub>2</sub>S<sub>7</sub>.

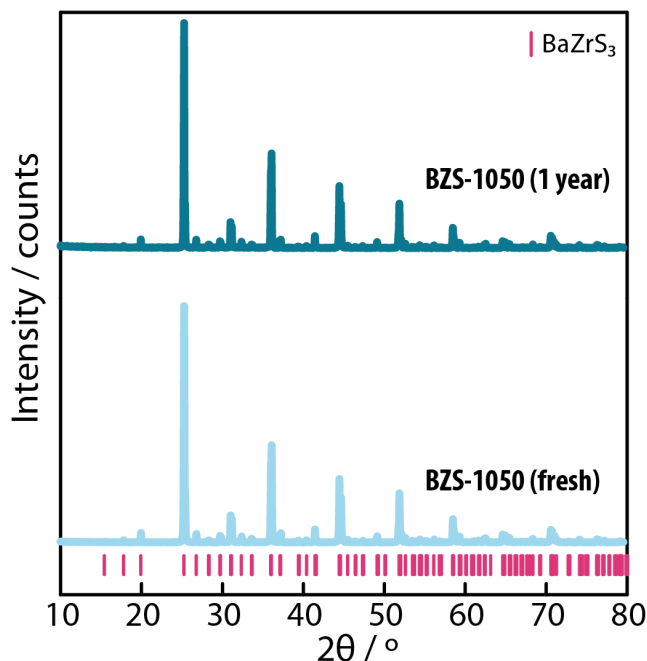

**Figure S7.** XRPD pattern of as prepared BZS-1050 sample and after air exposure for one year. Vertical lines indicate the peak positions of BaZrS<sub>3</sub> phase with an orthorhombic distorted perovskite structure belonging to the space group *Pnma* (JCPDS 01-073-0847).

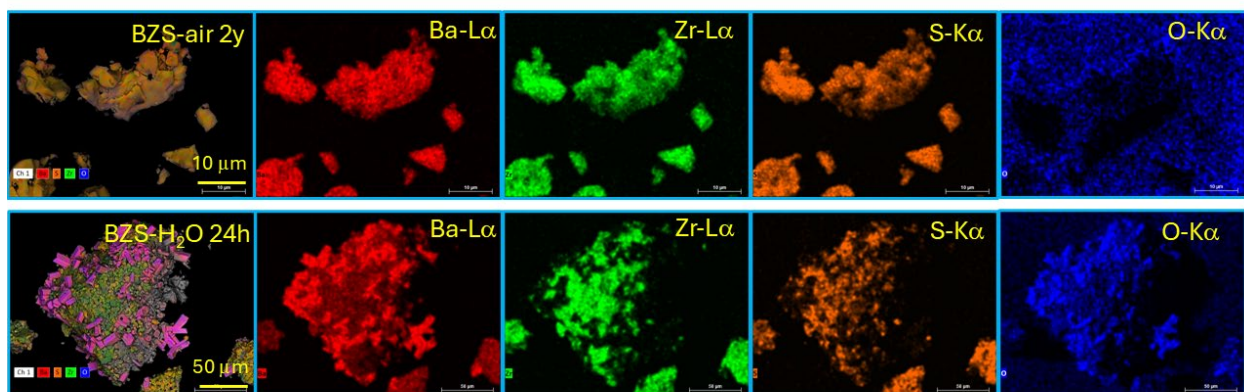

**Figure S8.** EDX maps (showing relevant X-ray emission lines for Ba, Zr, S and O) of BZS-1050 powders after air exposure for 2 years (top panel) and after water (MilliQ-grade) exposure for 24 h (bottom panel). Left-side images are obtained by the combination of the different single-colored images. The combined image for air-exposed BZS shows a uniform color, indicating good compositional homogeneity. In that sample, O-K $\alpha$  signal from the sample holder is also observed, due to the low O-content in the BZS powders. On the contrary, a clear oxidation of the powders is observed after water immersion (as evidenced by the O-K $\alpha$  signal), giving rise to segregation of oxygen-rich Ba phases forming prismatic crystals and S-containing Zr-rich phases.

### S3. Additional characterization of the Ln<sup>3+</sup>-doped materials.

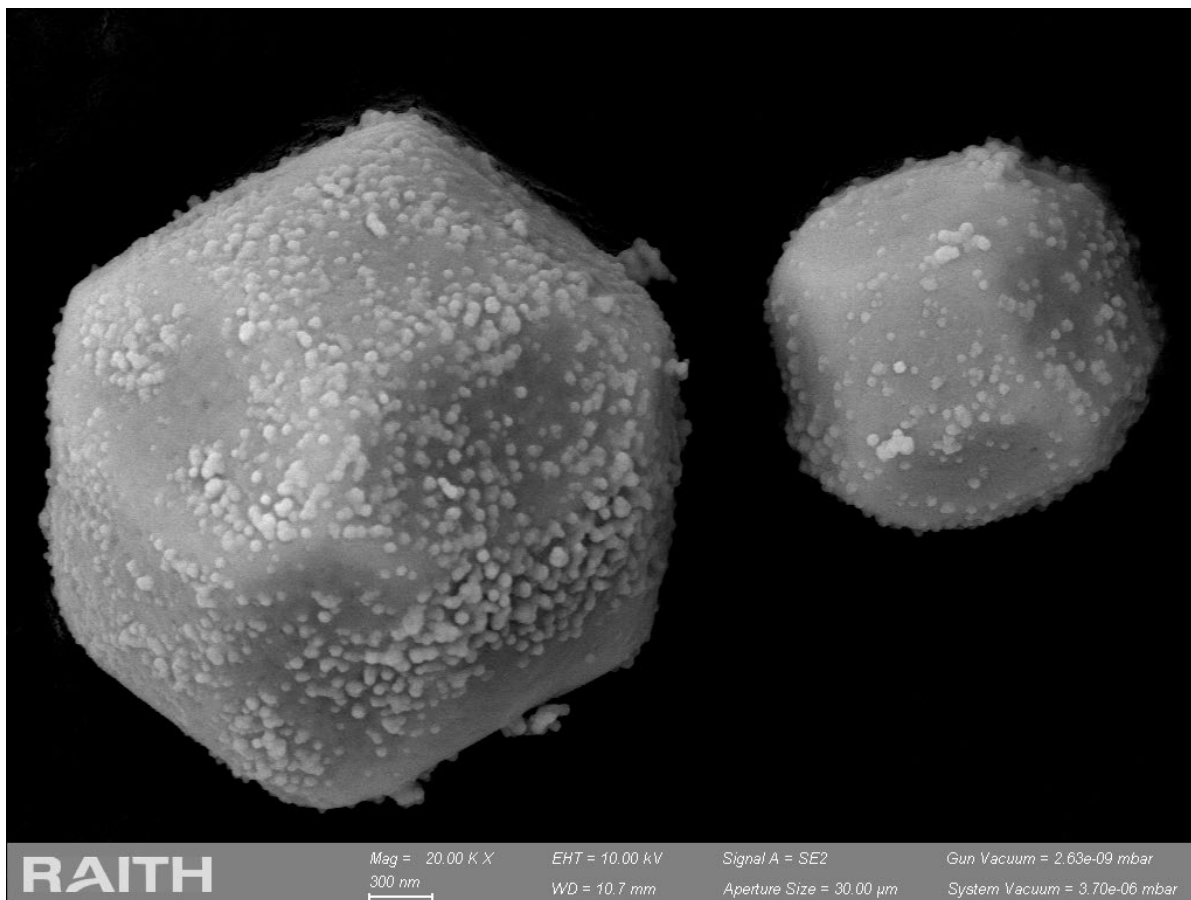

**Figure S9.** High/magnification SEM image of BZO-Er sample, showing the decaoctahedral morphology typical of this material.



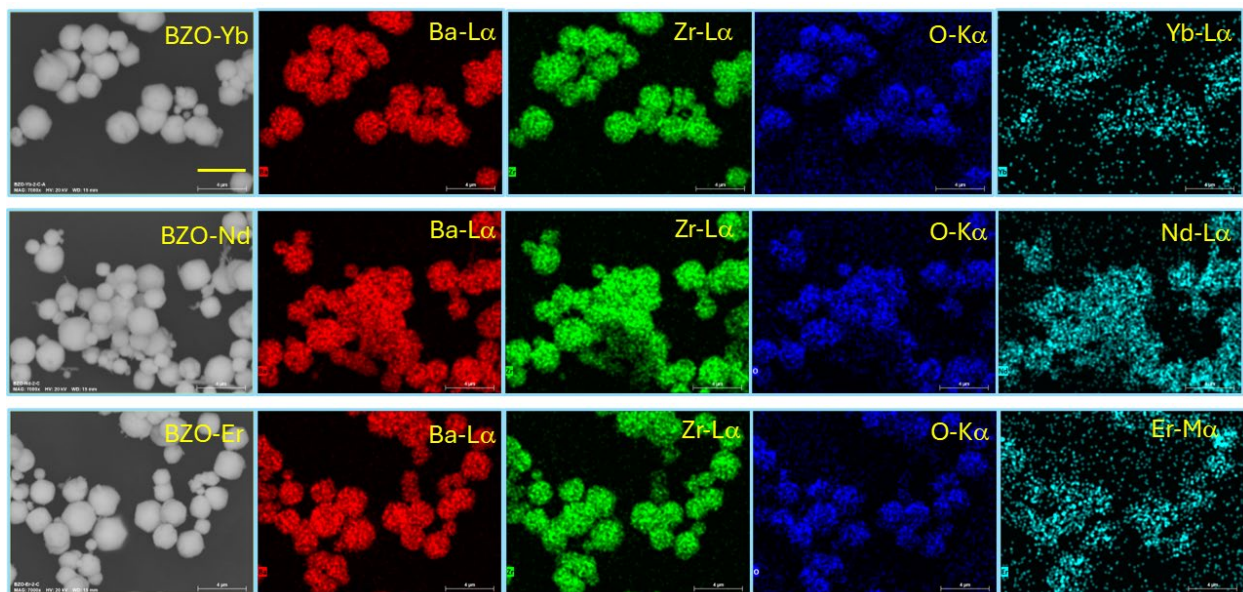

**Figure S10.** Back-scattered electron images and EDX maps (showing relevant X-ray emission lines for each element) of BZO-Ln series. Top panel: BZO-Yb powders, middle panel: BZO-Nd and bottom panel: BZO-Er. The scale bar is 4  $\mu\text{m}$  in all images.

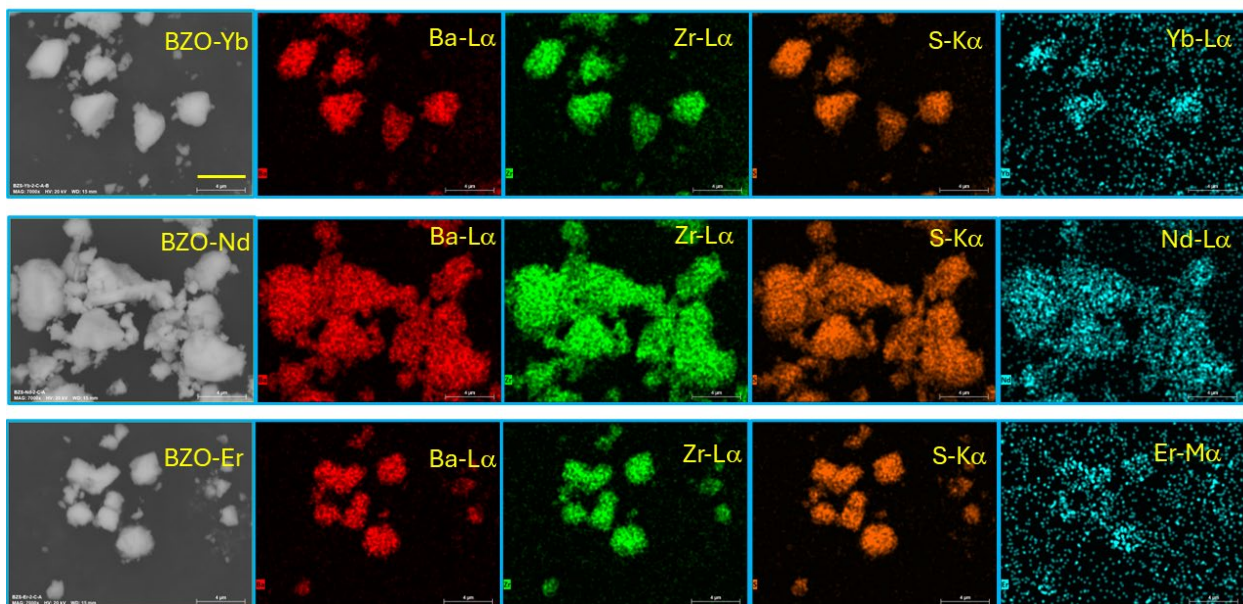

**Figure S11.** Back scattered electron images and EDX maps (showing relevant x-ray emission lines for each element) of BZS-Ln series. Top panel: BZS-Yb powders, middle panel: BZS-Nd and bottom panel: BZS-Er. The scale bar is 4  $\mu\text{m}$  in all images.

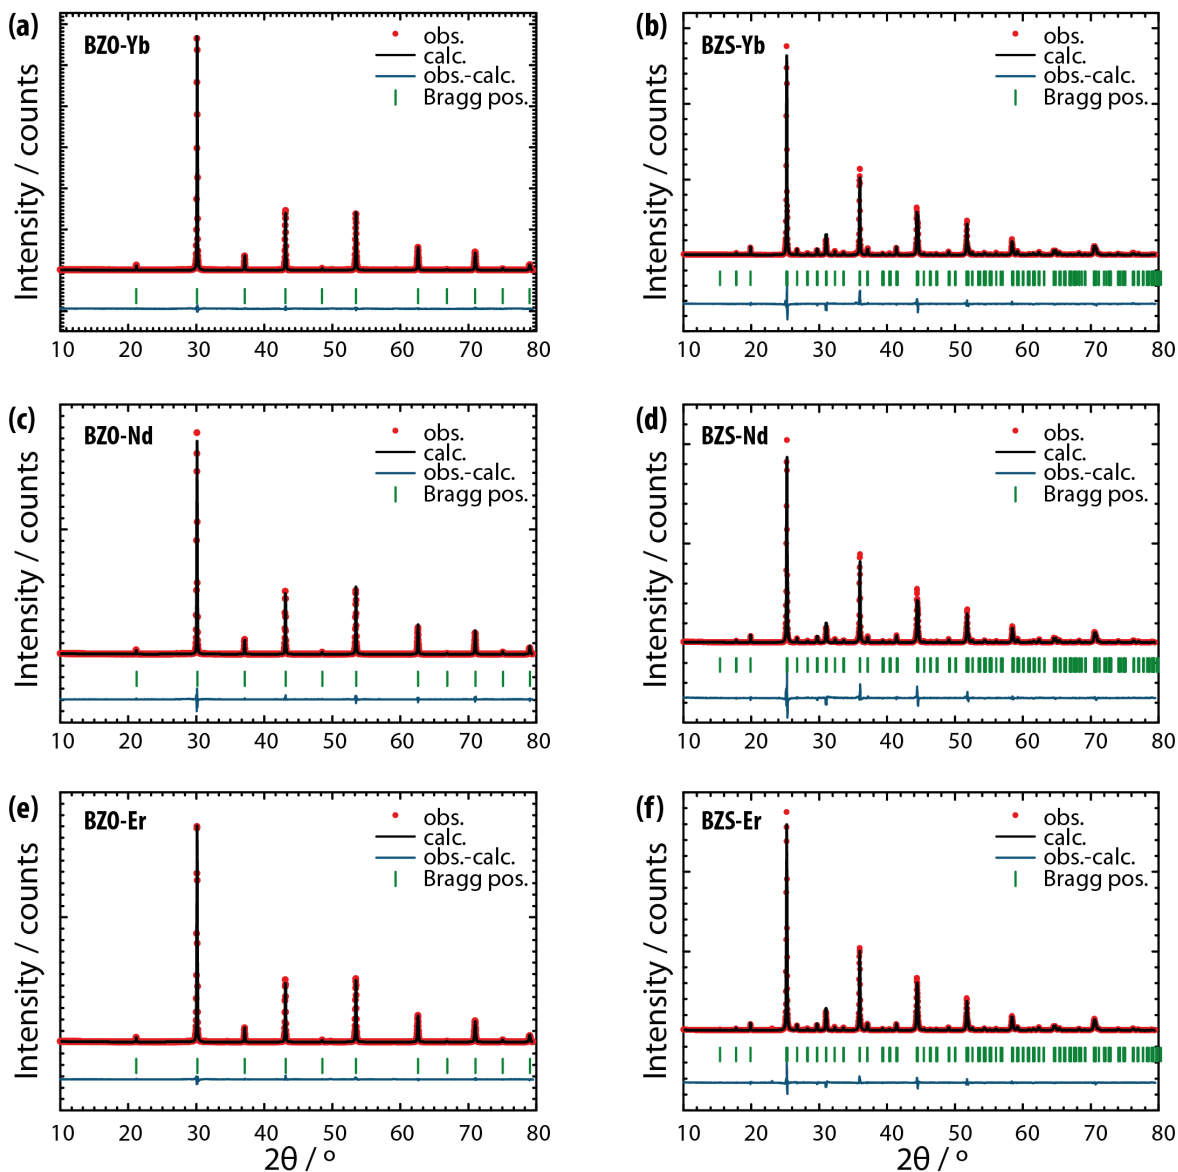

**Figure S12.** XRPD patterns (red points) of (a) BZO-Yb, (b) BZS-Yb, (c) BZO-Nd, (d) BZS-Nd, (e) BZO-Er, (f) BZS-Er samples. Black lines are the Rietveld refinements of the patterns, whereas the blue lines represent the differences between experimental and refined patterns. Peak positions of Bragg peaks are indicated by vertical green lines.

**Table S1.** Lattice parameters, unit cell volume and chi-square fitting value obtained in Rietveld refinements of undoped and Ln<sup>3+</sup>-doped BaZrO<sub>3</sub> samples.

| Sample name            | a (Å)     | V (Å <sup>3</sup> ) | χ <sup>2</sup> |
|------------------------|-----------|---------------------|----------------|
| BZO                    | 4.1918(1) | 73.655              | 2.46           |
| BZO-Nd                 | 4.1933(1) | 73.732              | 3.46           |
| BZO-Er                 | 4.1941(1) | 73.777              | 3.32           |
| BZO-Yb                 | 4.1944(1) | 73.790              | 3.65           |
| BaZrO <sub>3</sub> [5] | 4.193     |                     |                |
| BaZrO <sub>3</sub> [6] | 4.1943    |                     |                |

**Table S2.** Lattice parameters, unit cell volume and chi-square fitting value obtained from the Rietveld refinements of undoped and Ln<sup>3+</sup>-doped BaZrS<sub>3</sub> samples.

| Sample name            | a (Å)  | b (Å)  | c (Å)  | V (Å <sup>3</sup> ) | χ <sup>2</sup> |
|------------------------|--------|--------|--------|---------------------|----------------|
| BZS-1000               | 7.0659 | 9.9824 | 7.0189 | 495.08              | 3.72           |
| BZS-Nd                 | 7.0651 | 9.9799 | 7.0286 | 495.58              | 6.85           |
| BZS-Er                 | 7.0672 | 9.9911 | 7.0393 | 497.04              | 4.21           |
| BZS-Yb                 | 7.0708 | 9.9920 | 7.0311 | 496.76              | 6.71           |
| BaZrS <sub>3</sub> [7] | 7.061  | 9.977  | 7.014  | 494.1               | 1.07           |
| BaZrS <sub>3</sub> [8] | 7.0599 | 9.9813 | 7.0251 | 495.04              |                |

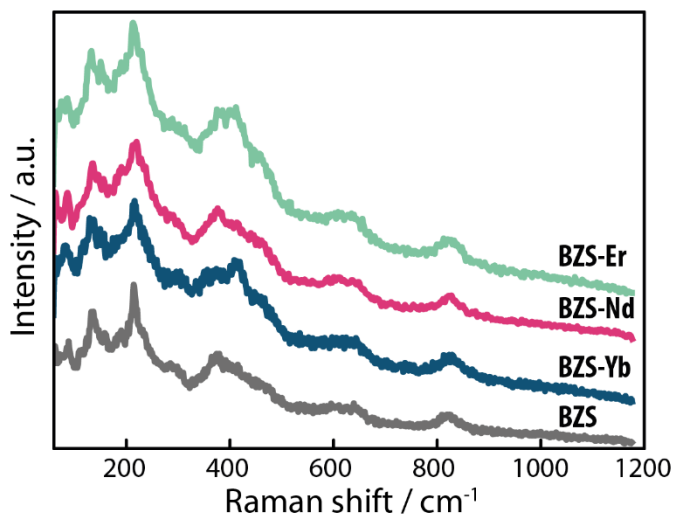

**Figure S13.** Raman spectra of the BZS-Ln series and BZS-1000. The spectra have been vertically shifted to allow a better comparison.

**Table S3.** Wavenumber values (cm<sup>-1</sup>) of the Raman bands observed for undoped and Ln<sup>3+</sup>-doped BZS powders.

| Assignment                                           | BZS-1000 | BZS-Yb | BZS-Er | BZS-Nd | Ref [9] | Ref [10] | Ref [11] | Ref [12] |
|------------------------------------------------------|----------|--------|--------|--------|---------|----------|----------|----------|
| A <sub>g</sub> <sup>1</sup>                          | 60       | 62     | 60     | 62     | 60      | 60       | 60       | 60       |
| B <sub>1g</sub> <sup>1</sup>                         | 90       | 83     | 82     | 85     | 90      | 90       | 87       | 85       |
| A <sub>g</sub> <sup>4</sup>                          | 130      | 135    | 133    | 134    | 130     | 130      | 130      | 140      |
| B <sub>2g</sub> <sup>6</sup>                         | 215      | 215    | 212    | 210    | 220     | 210      | 210      | 230      |
| B <sub>1g</sub> <sup>5</sup>                         | 390      | 400    | 380    | 380    | 390     | 400      | 400      | 410      |
|                                                      | ----     | 412    | 410    | 410    |         | --       | --       |          |
| E <sub>g</sub> (BZO)                                 | 615      | 615    | 615    | 630    |         | --       | --       | 620      |
| B <sub>1g</sub> <sup>5</sup> (2 <sup>nd</sup> order) | 820      | 825    | 825    | 825    |         | --       |          | 820      |

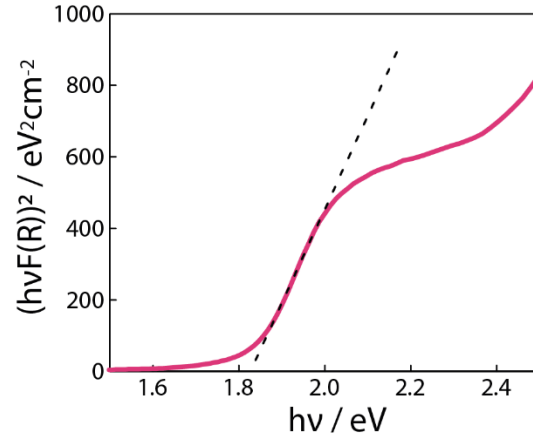

**Figure S14.** Tauc plot of the BZS-Yb sample (representative of the BZS-Ln series) obtained from the diffuse reflectance spectroscopy measurements ( $F(R)$  represents the Kubelka-Munk function). The dashed line is the linear fit used to calculate the optical bandgap.

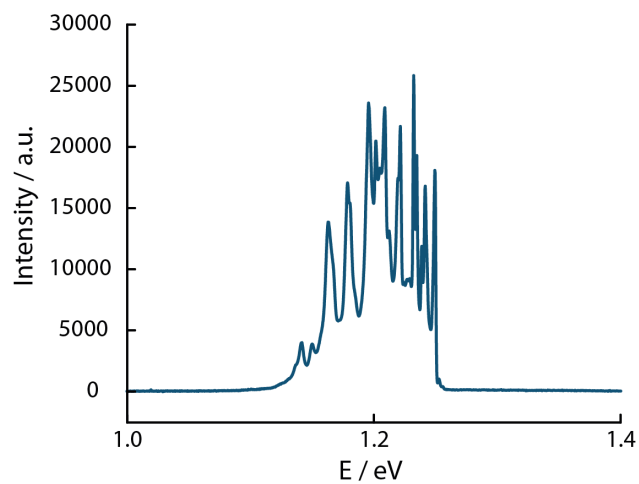

**Figure S15.** Photoluminescence of BSZ-Yb at 10 K under 405-nm excitation.

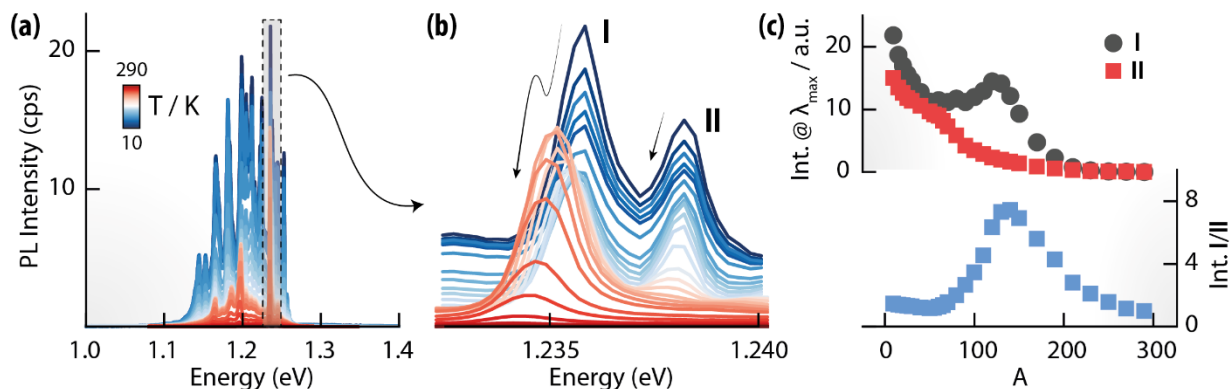

**Figure S16.** (a) Photoluminescence spectra of BSZ-Yb collected under 532-nm excitation as a function of temperature. (b) A zoom-in of the  $\text{Yb}^{3+}:^2\text{F}_{5/2} \rightarrow ^2\text{F}_{7/2}$  emission band shows a different trend of what appear to be two Stark components (I and II). (c) The analysis of the intensity of the maximum of I and II shows that I undergoes thermal anti-quenching between 70 and 120 K, while II follows a more typical monotone thermal quenching along the whole range of explored temperatures. This observation, paired with the fact that at least 12 components could be counted in the emission of  $\text{Yb}^{3+}$  at 10 K – way more than the expected 4 Staks levels expected for the  $\text{Yb}^{3+}:^2\text{F}_{5/2} \rightarrow ^2\text{F}_{7/2}$  band – suggests that multiple  $\text{Yb}^{3+}$  populations are present in the crystal structure. This is not surprising, considering three factors. First, there is a charge mismatch between  $\text{Zr}^{4+}$  and  $\text{Ln}^{3+}$ . Hence substitutional doping is bound to introduce defects and, hence, disorder in the structure. Second,  $\text{BaZrS}_3$  is S-deficient. Thus, different defects are expected to be found at different crystal locations. Third,  $\text{Ln}^{3+}$  could also occupy the A-site. Because of the above, it is not surprising that multiple  $\text{Yb}^{3+}$  populations are present in the crystal, each subjected to different quenching (or anti-quenching) processes that depend on the local crystal environment.

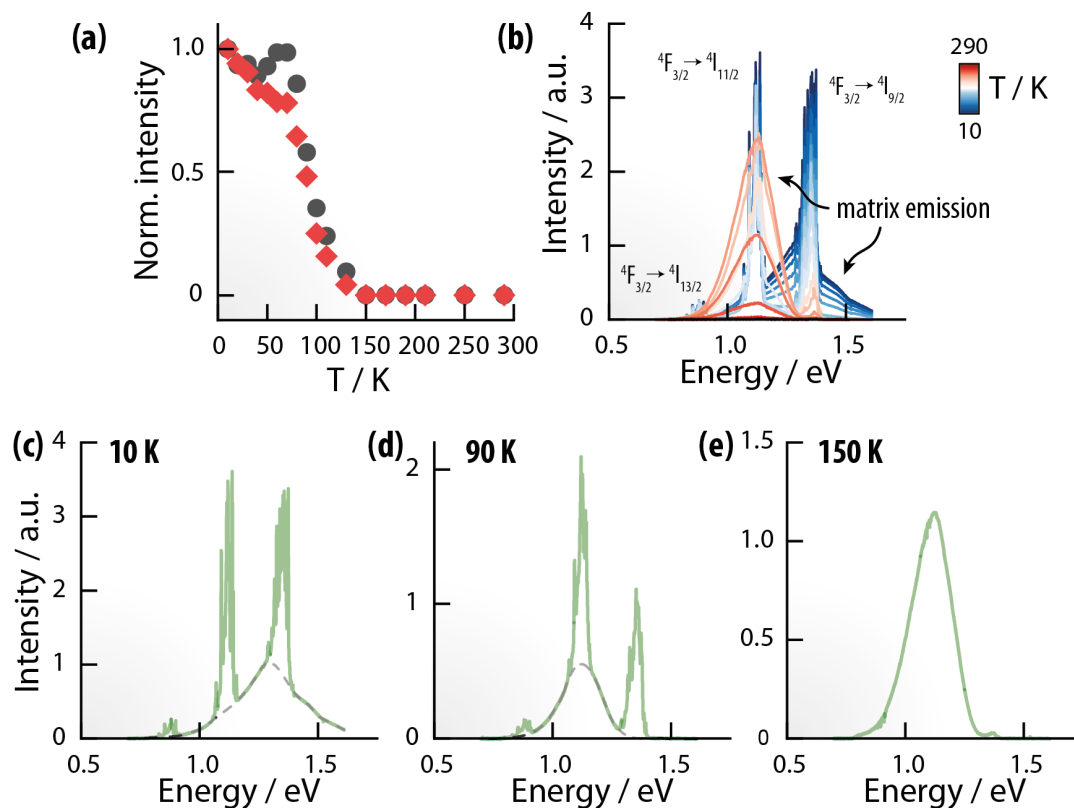

**Figure S17.** (a) Intensity vs temperature for the  $\text{Nd}^{3+}:{}^4F_{3/2} \rightarrow {}^4I_{11/2}$  (red) and  $\text{Nd}^{3+}:{}^4F_{3/2} \rightarrow {}^4I_{9/2}$  (grey) bands. The integrated intensity was obtained from the dataset shown in (b) – recorded under 405-nm excitation – after manually subtracting the broad emission coming from the matrix as shown in (c) and (d). Only matrix emission is observed increasing the temperature to reach 150 K (e). The intensity vs temperature plot shown in **Figure 4g** of the main manuscript was obtained from the average of the 2 datasets in (a) to account for inaccuracies in the treatment in the manual subtraction of the broad signals. Like in the case of BZS-Yb, the number of Stark levels observed in  $\text{Nd}^{3+}$  emissions is higher than the expected one (e.g., at least 15 components are observed for the  $\text{Nd}^{3+}:{}^4F_{3/2} \rightarrow {}^4I_{11/2}$  transition instead of the expected 6). This is, again, an indication of multiple  $\text{Ln}^{3+}$  populations.



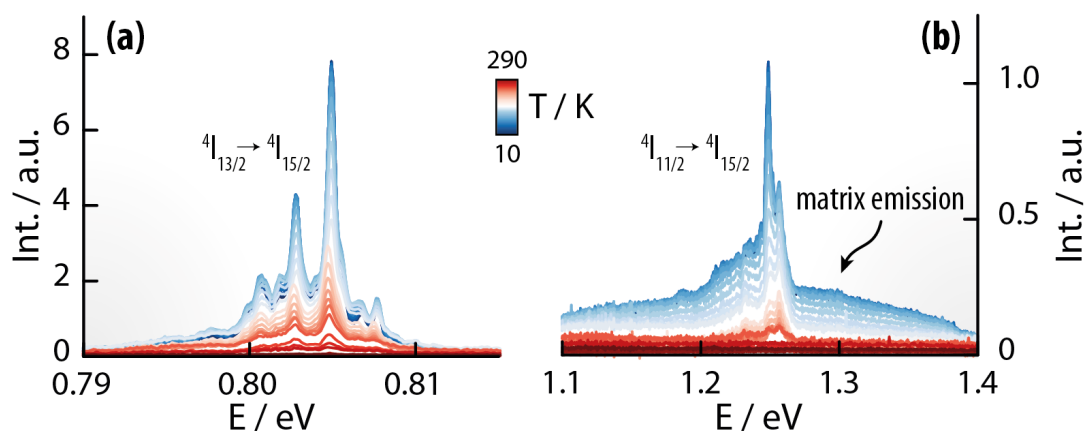

**Figure S18.** Zoom in of the  $\text{Er}^{3+}:4I_{13/2} \rightarrow 4I_{15/2}$  (a) and  $\text{Er}^{3+}:4I_{11/2} \rightarrow 4I_{15/2}$  (b) transitions measured at different temperatures exciting BZS-Er at 405 nm. The  $\text{Er}^{3+}:4I_{13/2} \rightarrow 4I_{15/2}$  transition was integrated to obtain the trend of intensity vs temperature in **Figure 4i** of the main manuscript, given its lack of overlap with the emission from the matrix.

**Table S4.** Values of the parameters used for the Mott-Seitz fits reported in **Figure 4** of the main manuscript.

| Sample name | $\alpha_1$        | $\Delta E_1 / \text{cm}^{-1}$ (meV) | $\alpha_2$        | $\Delta E_2 / \text{cm}^{-1}$ (meV) | $\chi^2$ |
|-------------|-------------------|-------------------------------------|-------------------|-------------------------------------|----------|
| BZS-1000    | 70                | 161 (20)                            | 15864             | 1306 (161)                          | 0.994    |
| BZS-Yb      | 17                | 107 (13)                            | $1.14 \cdot 10^7$ | 1834 (227)                          | 0.996    |
| BZS-Nd      | $3.56 \cdot 10^7$ | 583 (72)                            | -                 | -                                   | 0.988    |
| BZS-Er      | 78                | 245 (30)                            | 3311              | 1019 (126)                          | 0.994    |

## References

- [1] Niu, S.; *et al.* Bandgap Control via Structural and Chemical Tuning of Transition Metal Perovskite Chalcogenides. *Adv. Mater.*, **2017**, 29, 1604733.
- [2] Nishigaki, Y.; *et al.* Extraordinary Strong Band-Edge Absorption in Distorted Chalcogenide Perovskites. *Sol. RRL*, **2020**, 4, 1900555.
- [3] Niu, S.; *et al.* Optimal Bandgap in a 2D Ruddlesden–Popper Perovskite Chalcogenide for Single-Junction Solar Cells. *Chem. Mater.* **2018**, 30, 4882–4886.
- [4] Li, Y.; Singh, D.J.; Tunability of electronic and optical properties of the Ba–Zr–S system via dimensional reduction. *Eur. Phys. J. B*, **2018**, 91, 188.
- [5] Swanson, H.E.; Gilfrich, N.T.; Ugrinic, G.M. Standard X ray diffraction powder patterns. *Natl. Bur. Stand. (US)*, **1955**, Circular 539, V, 8.
- [6] Levin, I.; Amos, T.G.; Bell, S.M.; Farber, L.; Vanderah, T.A.; Roth, R.S.; Toby, B.H. Phase equilibria, crystal structures and dielectric anomaly in the BaZrO<sub>3</sub>-CaZrO<sub>3</sub> system. *J. Solid State Chemistry*, **2003**, 165, 160-181.
- [7] Niu, S.; *et al.* Bandgap Control via Structural and Chemical Tuning of Transition Metal Perovskite Chalcogenides. *Adv. Mater.*, **2017**, 29, 1604733.
- [8] Lelieveld, R.; IJdo, D. J. W. Sulphides with the GdFeO<sub>3</sub> structure. *Acta Crystallographica Section B*, **1980**, 36, 2223-2226.
- [9] Wei, X.; *et al.* Realization of BaZrS<sub>3</sub> chalcogenide perovskite thin films for optoelectronics. *Nano Energy*, **2020**, 68, 104317.
- [10] Perera, S.; *et al.* Chalcogenide perovskites – an emerging class of ionic semiconductors. *Nano energy*, **2016**, 22, 129–135.
- [11] Gross, N.; Sun, Y.-Y.; Perera, S.; Hui, H.; Wei, X.; Zhang, S.; Zeng, H.; Weinstein, B.A. Stability and Band-Gap Tuning of the Chalcogenide Perovskite BaZrS<sub>3</sub> in Raman and Optical Investigations at High Pressures. *Phys. Rev. Appl.*, **2017**, 8, 044014.
- [12] Pandey, J.; Ghoshal, D.; Dey, D.; Gupta, T.; Taraphder, A.; Koratkar, N.; Soni, A. Local ferroelectric polarization in antiferroelectric chalcogenide perovskite BaZrS<sub>3</sub> thin films. *Phys. Rev. B*, **2020**, 102, 205308.
